# Supplementary material for: The Stilbene Synthase Family in Arachis: A Genome-Wide Study and Functional Characterization in Response to Stress
Source: MDPI journal article supplement (doi:10.3390/genes14122181), 2023-12-05
Supplement: s1 [file s1]

## **Supplementary files**

**The Stilbene Synthase Family in *Arachis*: A Genome-Wide Study and Functional Characterization in Response to Stress**

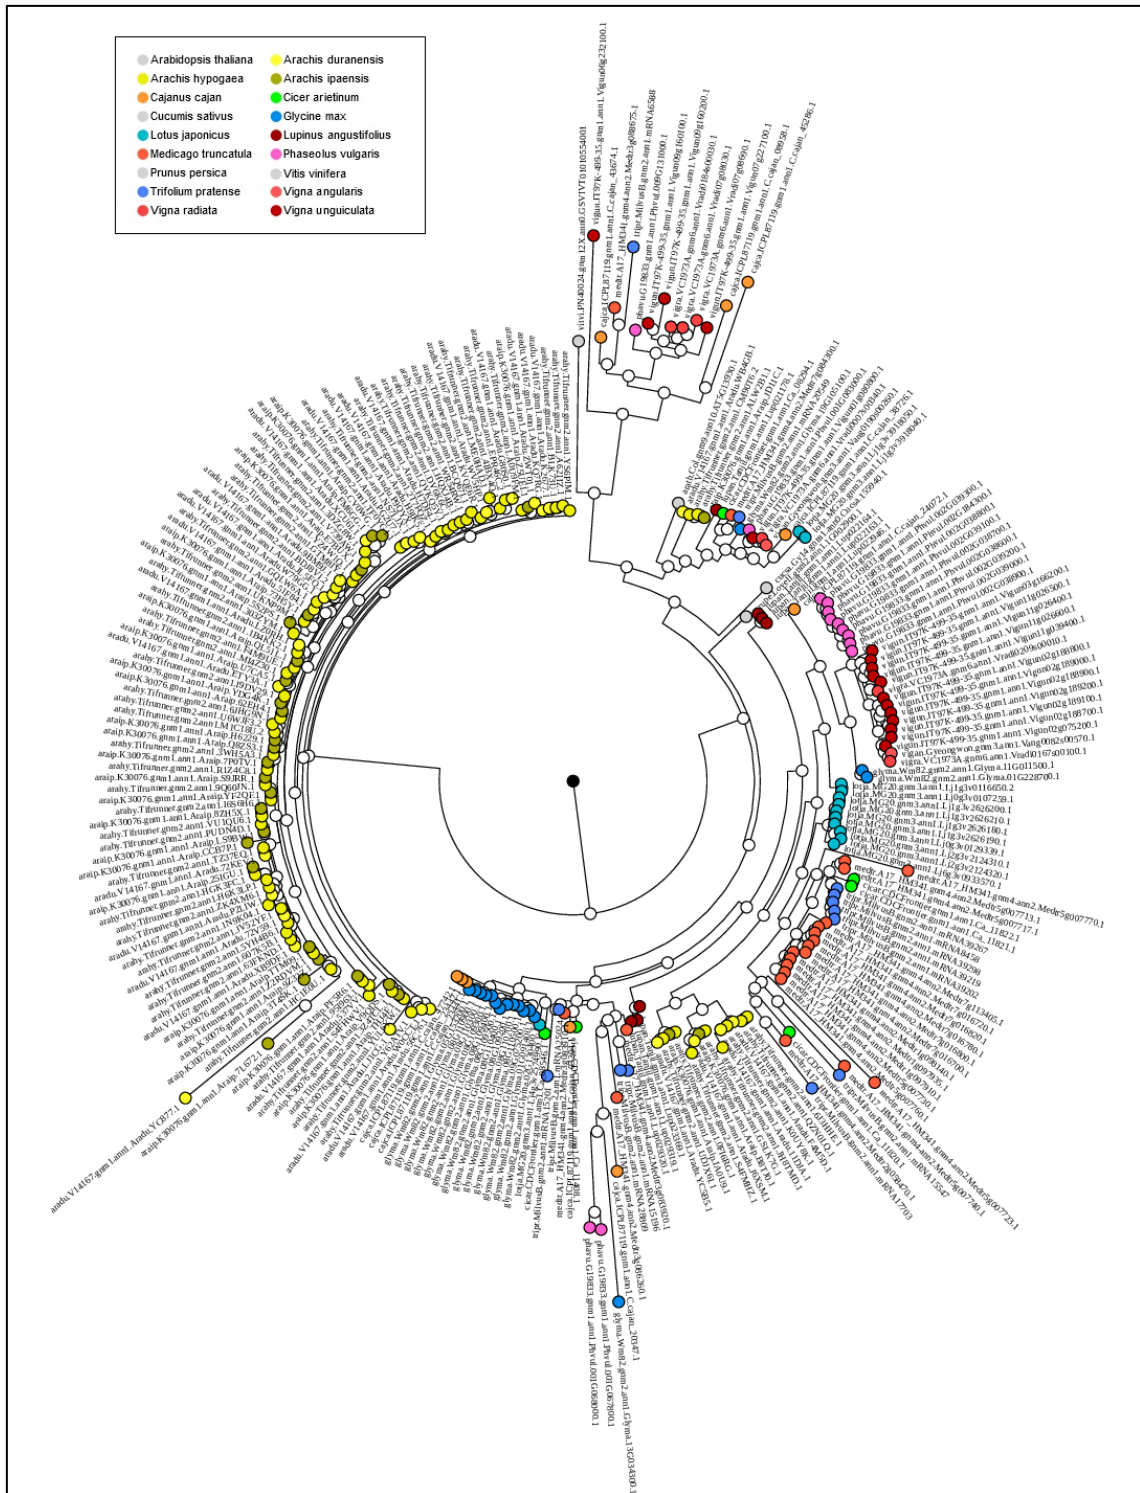

**Figure S1.** Gene tree of *Arachis* CHS and STS syntenic genes of three *Arachis* (*A. duranensis*, *A. ipaensis*, and *A. hypogaea*), 11 legumes and four non-legume species.

(A)  
*Arachis duranensis*

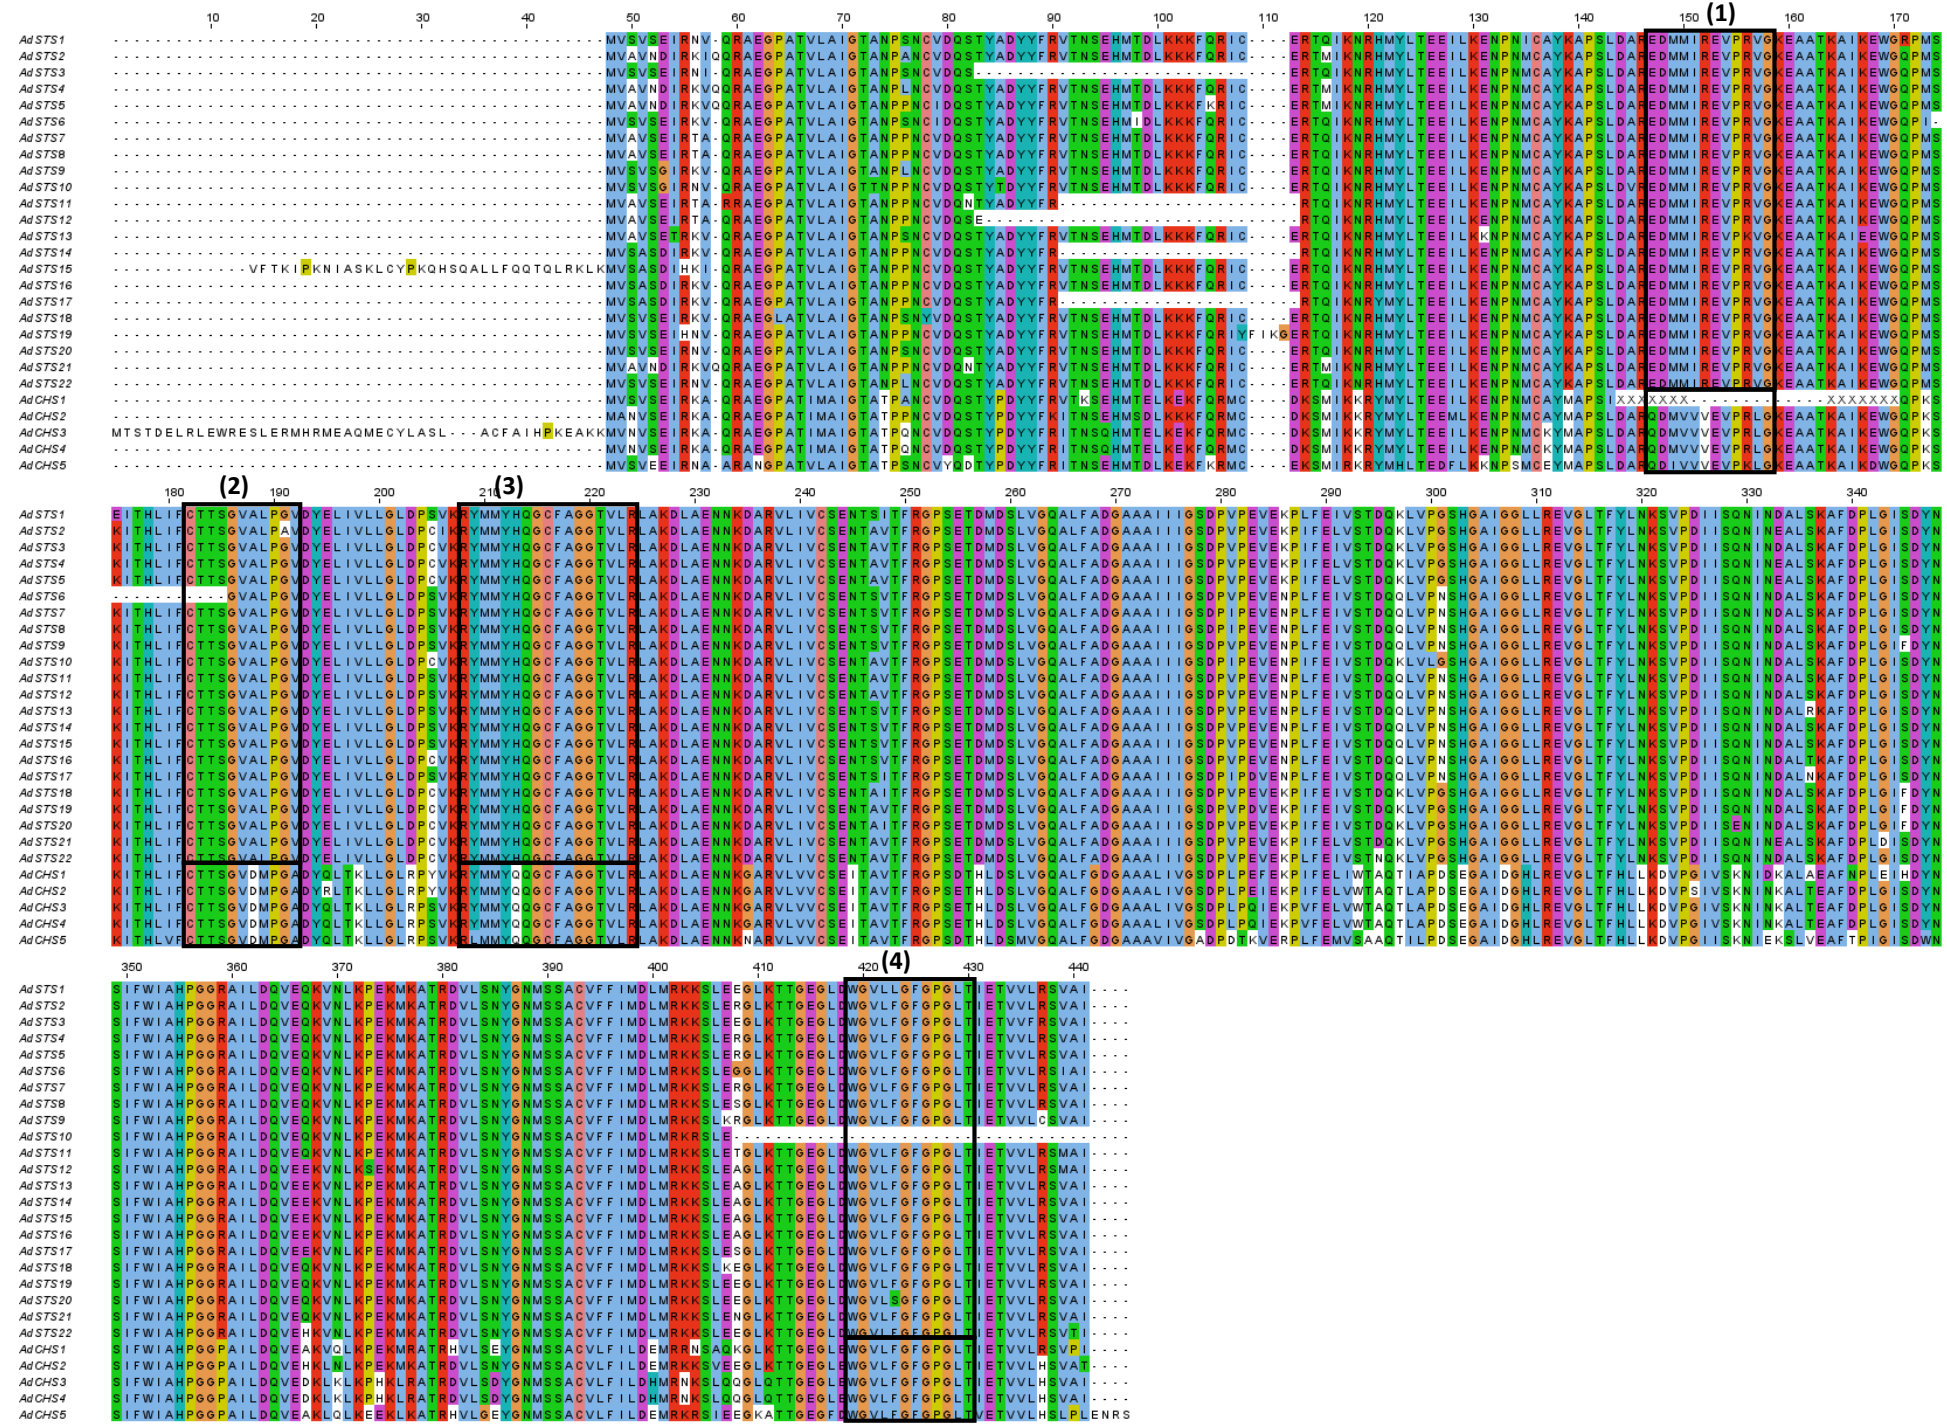



(B)  
*Arachis*  
*ipaënsis*

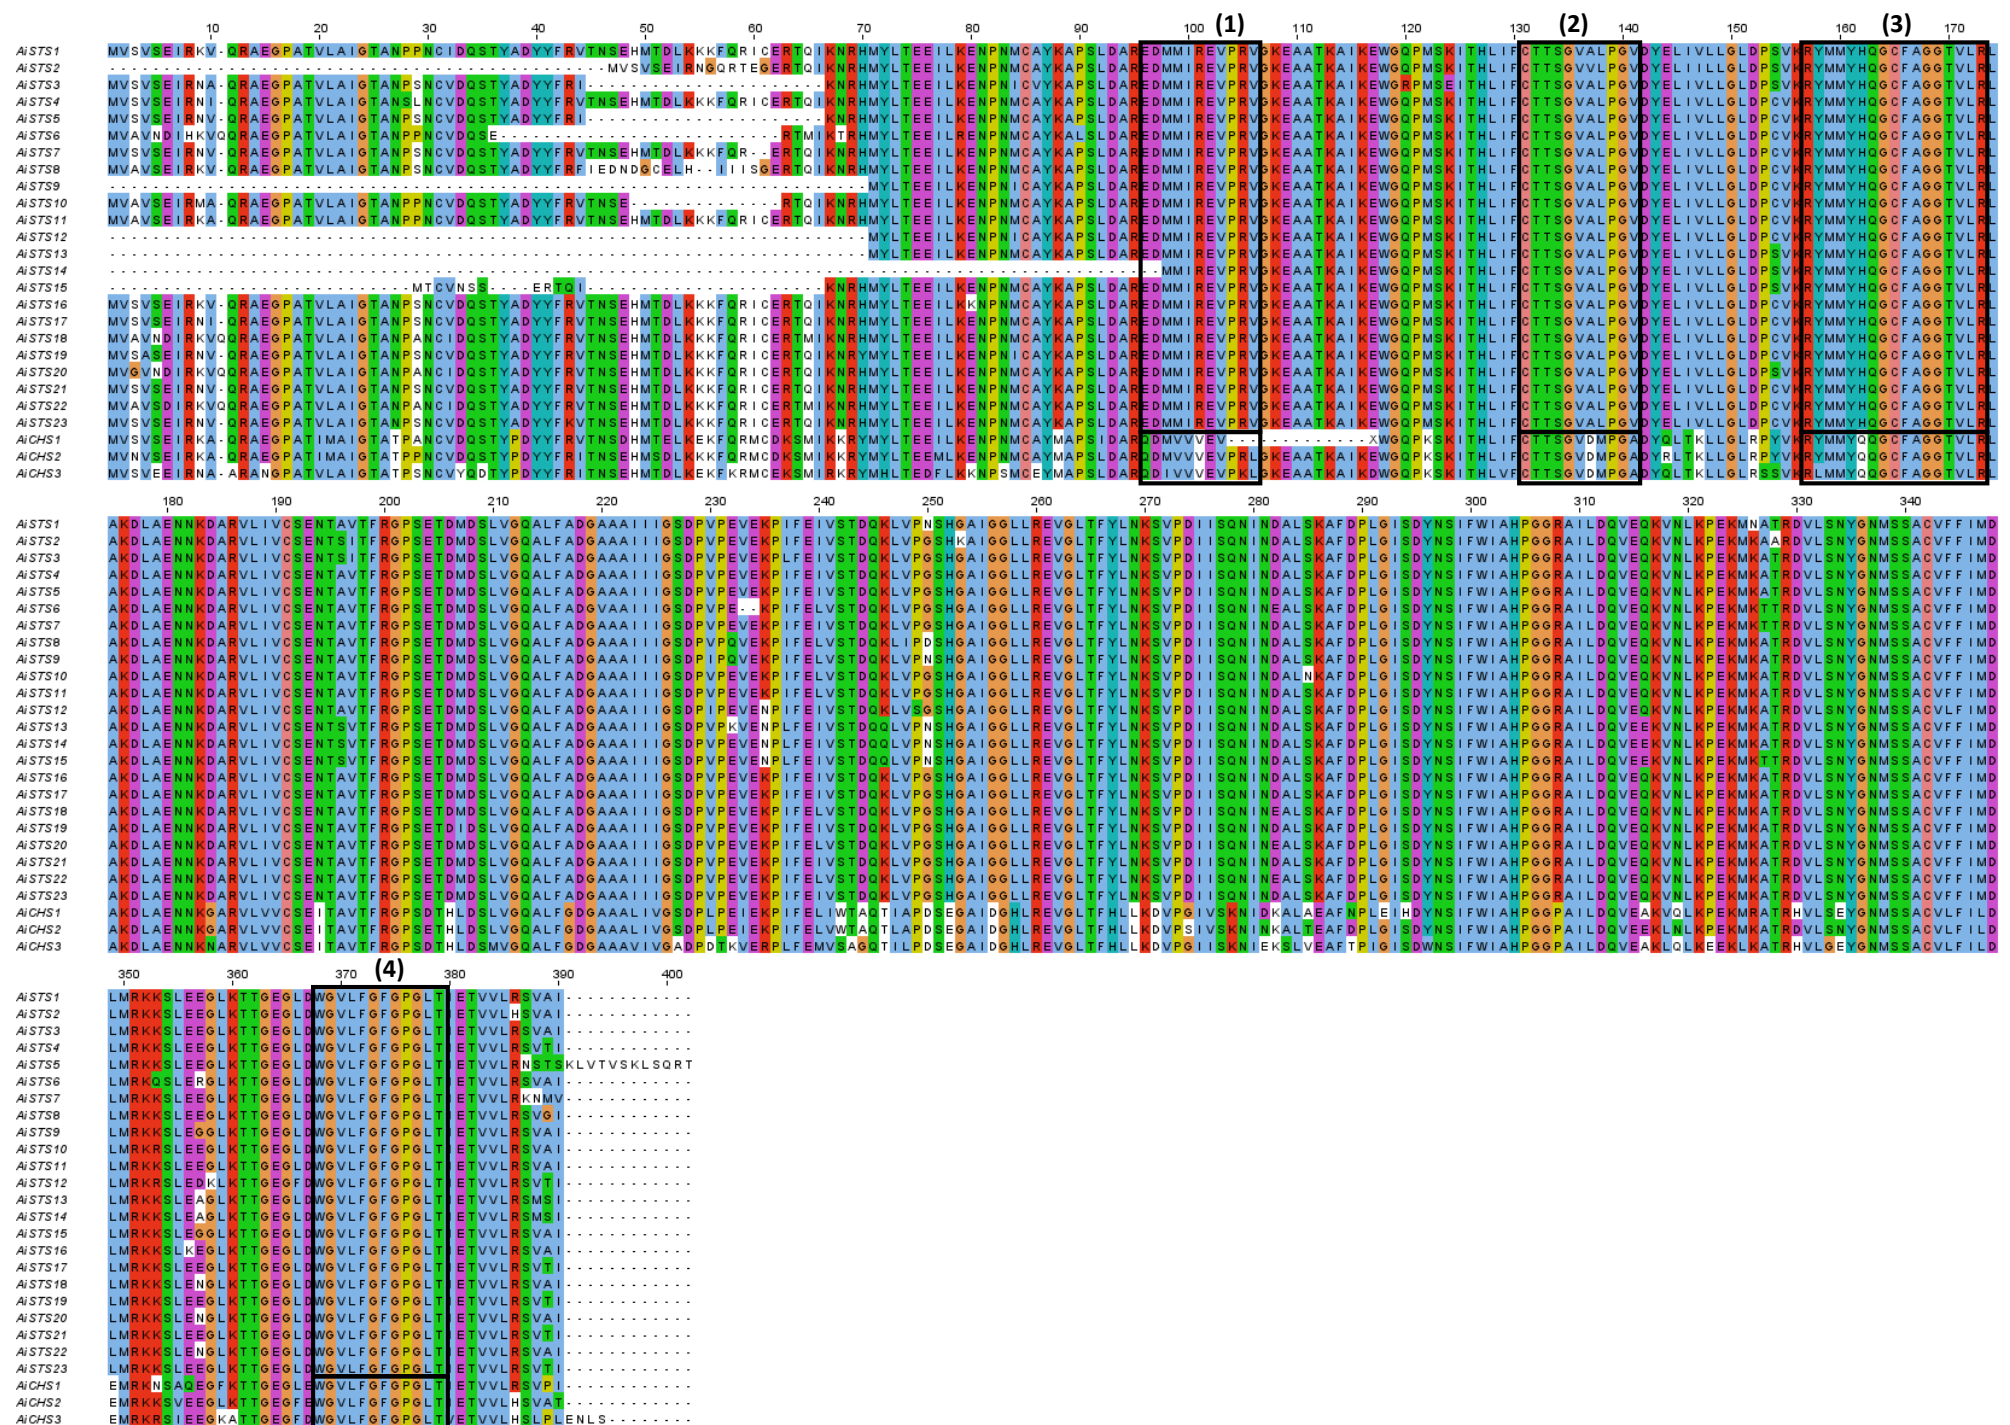

(c)  
*Arachis*  
*stenosperma*

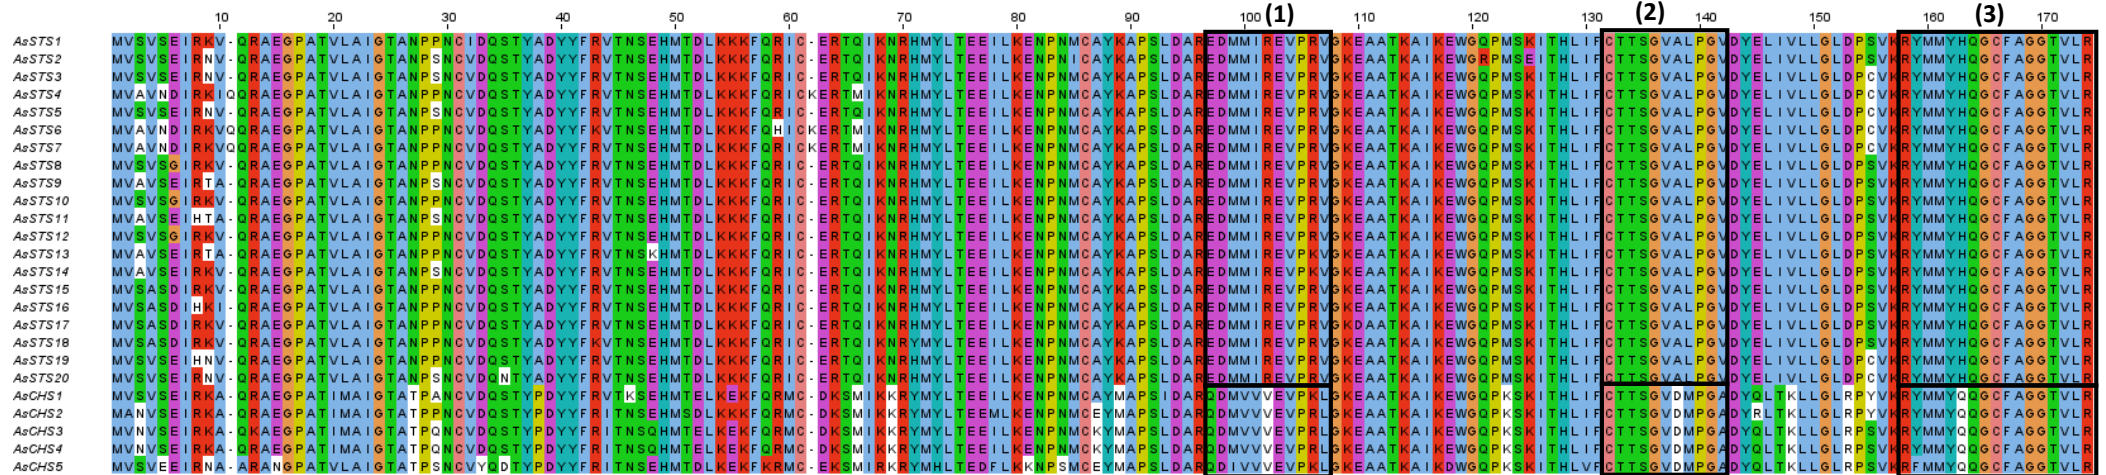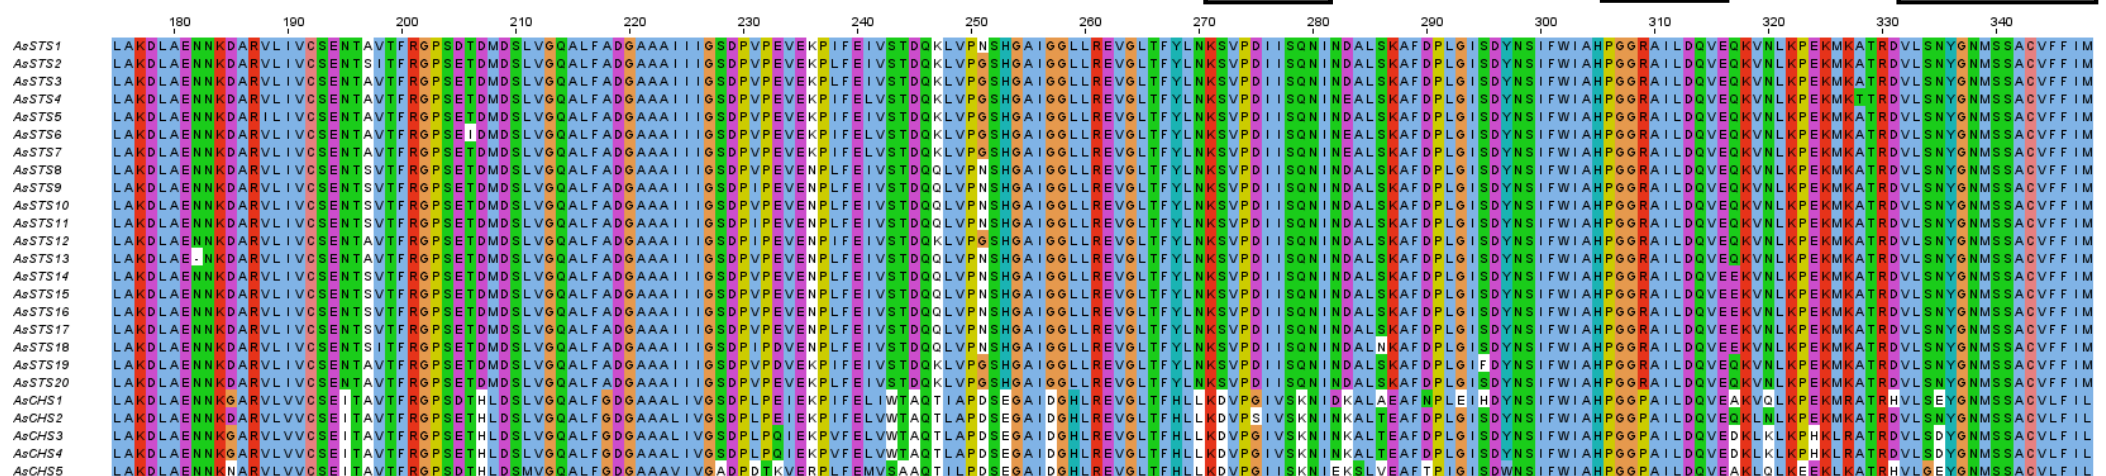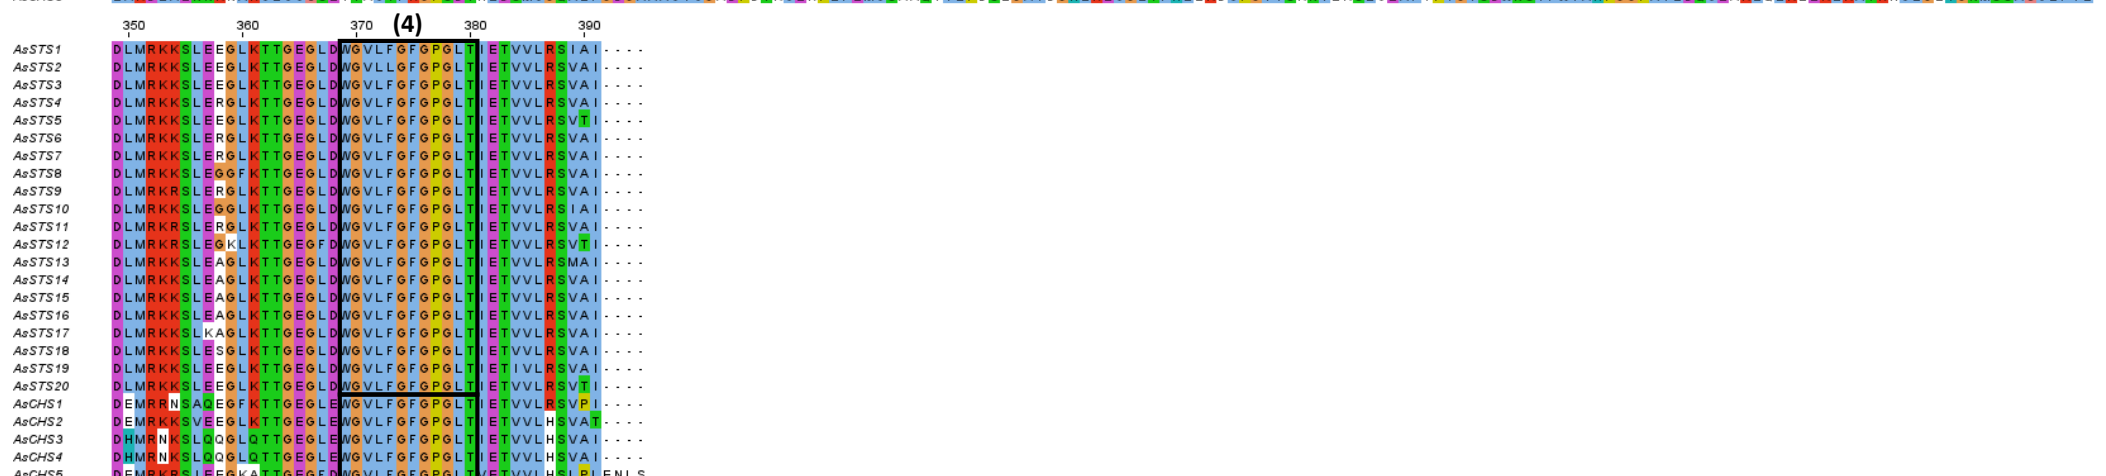



(D)  
*Arachis hypogaea*

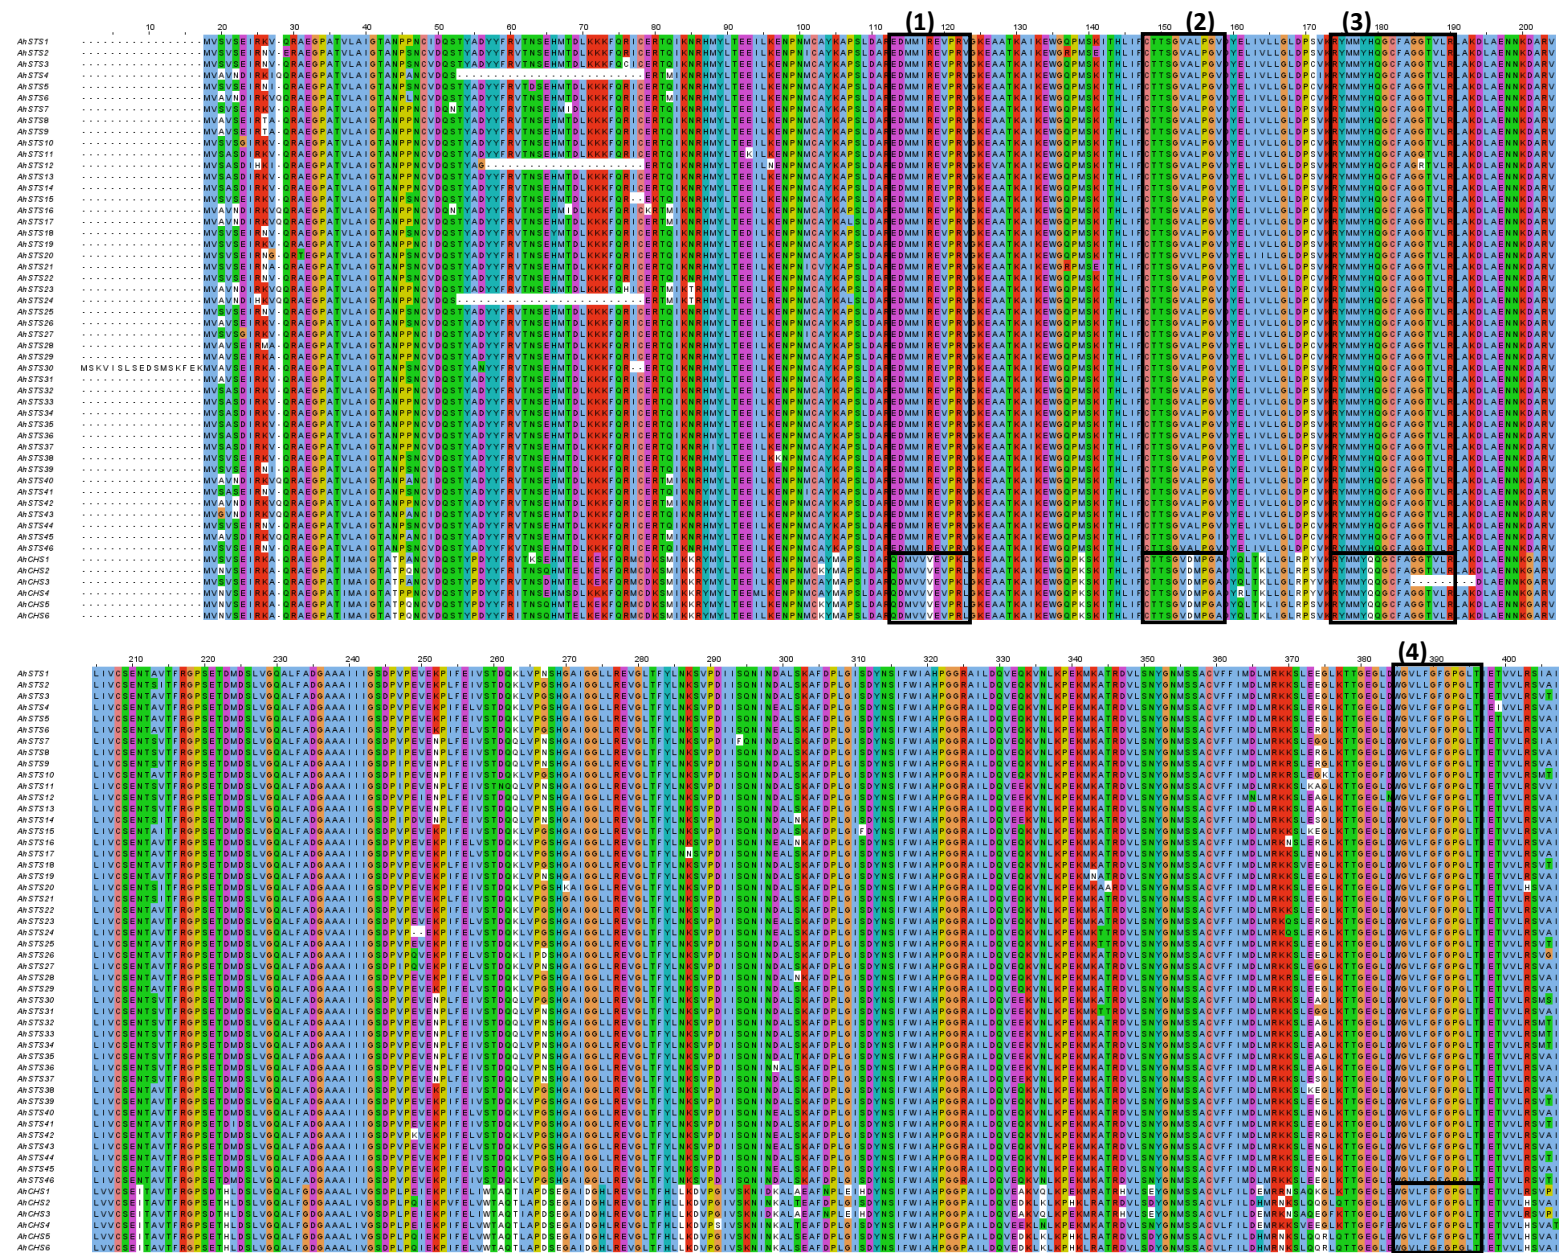

**Figure S2.** Alignment of CHS and STS amino acid sequences of (A) *Arachis duranensis*; (B) *A. ipaënsis*; (C) *A. stenosperma*; and (D) *A. hypogaea*. (1) = STS and CHS specific residues around Met98; (2) = STS and CHS specific residues around Thr132; (3) = CHS/STS active site (Prosite entry PS00441); (4) = CHS/STS signature motif.

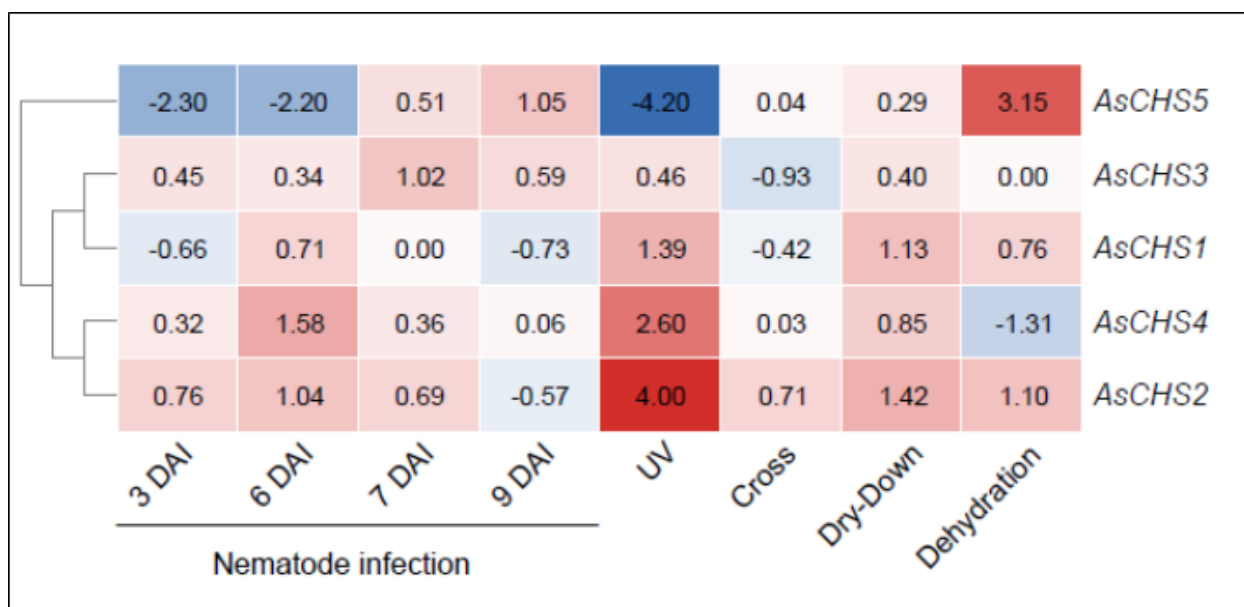

**Figure S3.** Heatmap of the *in silico* expression patterns of five *Arachis stenosperma* CHS genes in response to different types of stresses: nematode infection (at 3, 6, 7, and 9 days after infection; DAI); Ultraviolet (UV) exposure; drought treatments (Dry-Down and Dehydration); and combined drought imposition and nematode infection (Cross). The color key represents differential gene expression magnitude in Log2 fold change (FC) values.

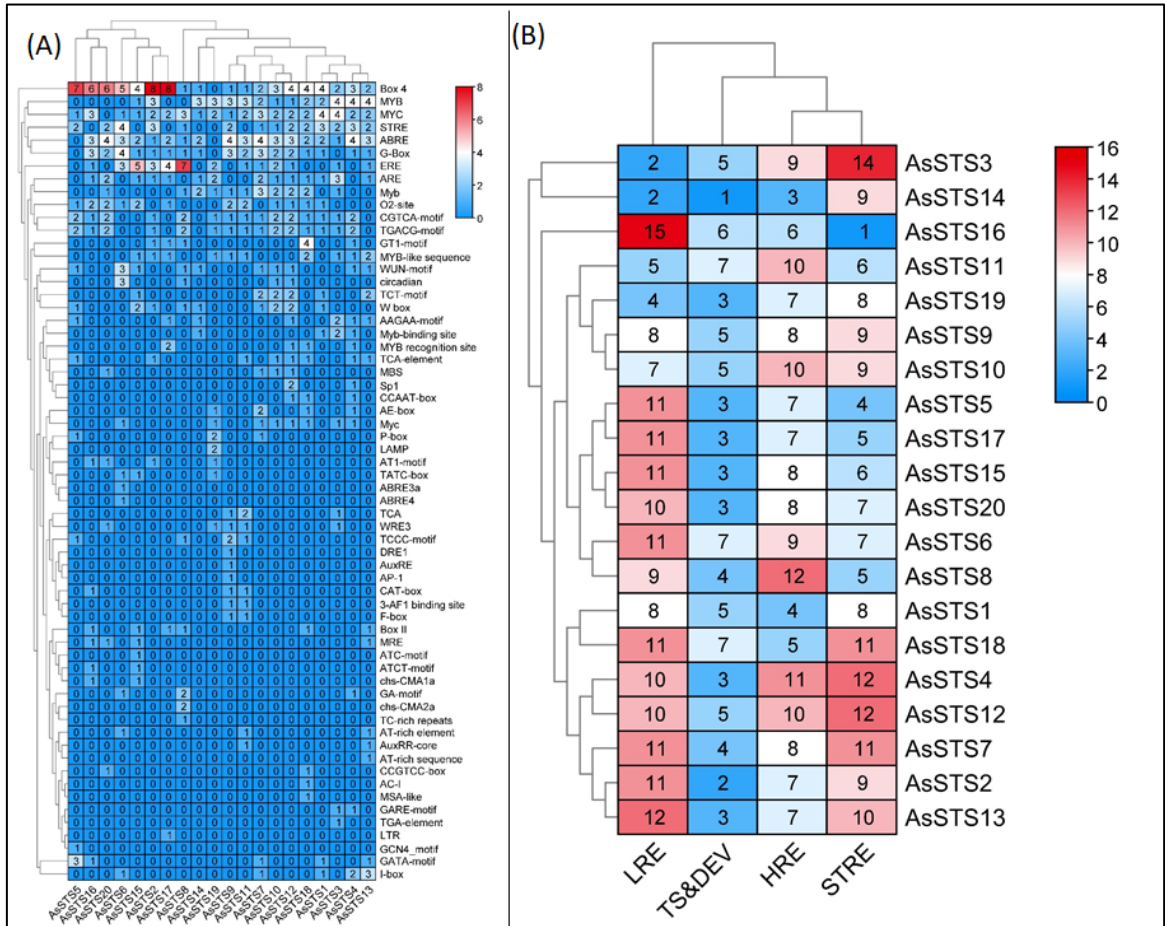

**Figure S4.** Heatmap of *cis*-acting elements (A) and their corresponding categories (B) in the promoter regions of 20 *Arachis stenosperma* STS genes. The heatmap colors ranged from red to blue, where red dark indicated increasing values in the numbers of *cis*-elements and blue scale decreasing values. *Cis*-acting elements are distributed in categories associated with responses to hormones (HRE), light (LRE) and stress (STRE) and related to tissue specificity and development (TS&DE).



**Table S1.** Members of CHS and STS families in *Arachis duranensis* genome.

| Gene |                |                |             |                              |                 | Deduced Protein |          |      |       |       |        | Subcellular Localization<br>(Plant-mSubP) |
|------|----------------|----------------|-------------|------------------------------|-----------------|-----------------|----------|------|-------|-------|--------|-------------------------------------------|
| Nº   | Nomenclature   | PeanutBase ID* | Chromossome | Genome position*             | ORF length (bp) | Size (aa)       | MW (kDa) | pI   | II    | AI    | GRAVY  |                                           |
| 1    | <i>AdCHS1</i>  | Aradu.YC5B5    | A03         | Aradu.A03:8292185..8294622   | 2,437           | 376             | 40.00    | 6.47 | 38.79 | 85.61 | -0.081 | Cytoplasm                                 |
| 2    | <i>AdSTS1</i>  | Aradu.51F84    | A04         | Aradu.A04:1877892..1879665   | 1,773           | 389             | 42.79    | 5.67 | 36.81 | 93.98 | -0.080 | Plastid                                   |
| 3    | <i>AdSTS2</i>  | Aradu.XB9DF    | A04         | Aradu.A04:10419781..10421746 | 1,965           | 390             | 43.00    | 6.35 | 31.69 | 93.03 | -0.059 | Plastid                                   |
| 4    | <i>AdSTS3</i>  | Aradu.LZ0RH    | A04         | Aradu.A04:10471622..10473114 | 1,492           | 363             | 39.60    | 5.43 | 36.14 | 94.55 | -0.013 | Plastid                                   |
| 5    | <i>AdSTS4</i>  | Aradu.72V59    | A04         | Aradu.A04:10477696..10479657 | 1,961           | 390             | 43.00    | 6.35 | 30.66 | 93.00 | -0.061 | Cytoplasm                                 |
| 6    | <i>AdSTS5</i>  | Aradu.72KEV    | A04         | Aradu.A04:10494783..10496775 | 1,992           | 390             | 43.00    | 6.62 | 32.18 | 92.26 | -0.075 | Cytoplasm                                 |
| 7    | <i>AdSTS6</i>  | Aradu.P9QYX    | A04         | Aradu.A04:10517219..10518802 | 1,583           | 377             | 41.67    | 5.56 | 33.87 | 94.14 | -0.088 | Plastid                                   |
| 8    | <i>AdSTS7</i>  | Aradu.K2677    | A04         | Aradu.A04:10523116..10525012 | 1,896           | 389             | 42.83    | 5.79 | 32.65 | 91.75 | -0.091 | Plastid                                   |
| 9    | <i>AdSTS8</i>  | Aradu.KQ7RG    | A04         | Aradu.A04:10548950..10550856 | 1,906           | 389             | 42.76    | 5.65 | 33.37 | 91.75 | -0.081 | Plastid                                   |
| 10   | <i>AdSTS9</i>  | Aradu.537VV    | A04         | Aradu.A04:10560818..10562728 | 1,910           | 389             | 42.84    | 6.34 | 31.11 | 92.72 | -0.052 | Plastid                                   |
| 11   | <i>AdSTS10</i> | Aradu.XCU6I    | A04         | Aradu.A04:10623792..10625303 | 1,511           | 355             | 39.35    | 6.12 | 30.82 | 90.90 | -0.123 | Plastid                                   |
| 12   | <i>AdSTS11</i> | Aradu.WOCCT    | A04         | Aradu.A04:10645838..10647566 | 1,728           | 370             | 40.54    | 5.53 | 37.57 | 92.78 | -0.043 | Plastid                                   |
| 13   | <i>AdSTS12</i> | Aradu.56C76    | A04         | Aradu.A04:10716985..10718721 | 1,736           | 363             | 39.49    | 5.22 | 37.03 | 94.57 | -0.012 | Plastid                                   |
| 14   | <i>AdSTS13</i> | Aradu.ZWT01    | A04         | Aradu.A04:10723334..10725328 | 1,994           | 389             | 42.81    | 5.80 | 36.22 | 91.23 | -0.097 | Golgi apparatus                           |
| 15   | <i>AdSTS14</i> | Aradu.H9IK5    | A04         | Aradu.A04:10764667..10766177 | 1,510           | 370             | 40.47    | 5.41 | 36.43 | 93.30 | -0.043 | Plastid                                   |
| 16   | <i>AdSTS15</i> | Aradu.WV5HP    | A04         | Aradu.A04:10815930..10817950 | 2,020           | 423             | 46.74    | 7.18 | 35.05 | 91.99 | -0.117 | Plastid                                   |
| 17   | <i>AdSTS16</i> | Aradu.H7DF4    | A04         | Aradu.A04:10846459..10848377 | 1,918           | 390             | 42.79    | 5.65 | 32.19 | 91.49 | -0.082 | Plastid                                   |
| 18   | <i>AdSTS17</i> | Aradu.G80S0    | A04         | Aradu.A04:10968649..10970160 | 1,511           | 370             | 40.56    | 5.31 | 36.49 | 93.57 | -0.05  | Plastid                                   |
| 19   | <i>AdCHS2</i>  | Aradu.J6XSM    | A04         | Aradu.A04:11029030..11030449 | 1,419           | 389             | 42.86    | 6.47 | 37.91 | 87.51 | -0.137 | Cytoplasm                                 |
| 20   | <i>AdSTS18</i> | Aradu.9BM9J    | A04         | Aradu.A04:11054255..11056291 | 2,036           | 389             | 42.96    | 6.35 | 32.09 | 93.24 | -0.060 | Plastid                                   |
| 21   | <i>AdSTS19</i> | Aradu.W79GG    | A04         | Aradu.A04:11061220..11063011 | 1,791           | 393             | 43.34    | 5.88 | 32.80 | 92.04 | -0.063 | Plastid                                   |
| 22   | <i>AdSTS20</i> | Aradu.JL5FQ    | A04         | Aradu.A04:11065139..11066915 | 1,776           | 389             | 42.81    | 5.67 | 33.91 | 92.24 | -0.071 | Plastid                                   |
| 23   | <i>AdSTS21</i> | Aradu.P2LIW    | A04         | Aradu.A04:11109622..11111683 | 2,061           | 390             | 43.03    | 5.96 | 29.86 | 92.00 | -0.087 | Cytoplasm                                 |
| 24   | <i>AdSTS22</i> | Aradu.ETY3A    | A04         | Aradu.A04:11112723..11114706 | 1,983           | 389             | 42.86    | 6.04 | 32.00 | 92.72 | -0.068 | Plastid                                   |
| 25   | <i>AdCHS3</i>  | Aradu.11DJA    | A05         | Aradu.A05:17517388..17520292 | 2,904           | 433             | 48.14    | 6.61 | 42.15 | 88.08 | -0.173 | Golgi apparatus                           |
| 26   | <i>AdCHS4</i>  | Aradu.F4M5D    | A05         | Aradu.A05:17541681..17543350 | 1,669           | 389             | 42.89    | 6.76 | 40.44 | 90.75 | -0.123 | Plastid                                   |
| 27   | <i>AdCHS5</i>  | Aradu.WB4GB    | A06         | Aradu.A06:93250793..93255394 | 4,601           | 393             | 43.23    | 6.18 | 38.37 | 88.58 | -0.124 | Cytoplasm                                 |

\* PeanutBase (<https://www.peanutbase.org/>)

**Table S2.** Members of CHS and STS families in *Arachis ipaënsis* genome.

| Nº | Gene           |                |             |                                    |                 | Deduced Protein |          |      |       |       |        | Subcellular Localization<br>(Plant-mSubP) |
|----|----------------|----------------|-------------|------------------------------------|-----------------|-----------------|----------|------|-------|-------|--------|-------------------------------------------|
|    | Nomenclature   | PeanutBase ID* | Chromossome | Genome position*                   | ORF length (bp) | Size (aa)       | MW (kDa) | pI   | II    | AI    | GRAVY  |                                           |
| 1  | <i>AiSTS1</i>  | Araip.PF5R6    | B01         | Araip.B01:9,622,636..9,624,428     | 1,793           | 389             | 42.86    | 5.80 | 34.30 | 92.24 | -0.090 | Plastid                                   |
| 2  | <i>AiCHS1</i>  | Araip.IA0U9    | B03         | Araip.B03:11,447,448..11,449,968   | 2,521           | 376             | 41.54    | 5.70 | 39.56 | 88.96 | -0.074 | Cytoplasm                                 |
| 3  | <i>AiSTS2</i>  | Araip.5S2PS    | B04         | Araip.B04:2,527,877..2,529,340     | 1,464           | 344             | 37.78    | 5.64 | 36.33 | 95.78 | -0.052 | Plastid                                   |
| 4  | <i>AiSTS3</i>  | Araip.73H5Y    | B04         | Araip.B04:2,549,548..2,551,064     | 1,517           | 367             | 40.45    | 5.32 | 38.85 | 95.64 | -0.011 | Plastid                                   |
| 5  | <i>AiSTS4</i>  | Araip.U7CA5    | B04         | Araip.B04:11,884,607..11,886,435   | 1,829           | 389             | 42.86    | 5.80 | 33.87 | 92.98 | -0.064 | Plastid                                   |
| 6  | <i>AiSTS5</i>  | Araip.H6229    | B04         | Araip.B04:11,935,038..11,948,045   | 13,008          | 379             | 41.48    | 5.85 | 33.80 | 93.11 | -0.048 | Plastid                                   |
| 7  | <i>AiSTS6</i>  | Araip.25IGU    | B04         | Araip.B04:11,979,690..11,982,488   | 2,799           | 362             | 39.59    | 5.78 | 36.00 | 96.41 | 0.009  | Plastid                                   |
| 8  | <i>AiSTS7</i>  | Araip.YDG4K    | B04         | Araip.B04:12,010,115..12,023,432   | 13,318          | 387             | 42.71    | 5.96 | 32.36 | 89.92 | -0.125 | Cytoplasm                                 |
| 9  | <i>AiSTS8</i>  | Araip.3T4SK    | B04         | Araip.B04:12,057,904..12,059,388   | 1,485           | 387             | 42.45    | 5.24 | 35.00 | 94.99 | -0.028 | Plastid                                   |
| 10 | <i>AiSTS9</i>  | Araip.9Z32Z    | B04         | Araip.B04:12,070,966..12,071,928   | 963             | 320             | 34.87    | 5.38 | 34.10 | 99.03 | 0.066  | Cytoplasm                                 |
| 11 | <i>AiSTS10</i> | Araip.S9JRR    | B04         | Araip.B04:12,080,850..12,082,158   | 1,309           | 375             | 41.07    | 5.43 | 37.14 | 93.09 | -0.032 | Plastid                                   |
| 12 | <i>AiSTS11</i> | Araip.YF2QF    | B04         | Araip.B04:12,121,743..12,123,473   | 1,731           | 389             | 42.78    | 5.96 | 32.78 | 91.75 | -0.076 | Cytoplasm                                 |
| 13 | <i>AiSTS12</i> | Araip.FM6GG    | B04         | Araip.B04:12,195,717..12,196,679   | 963             | 320             | 34.98    | 5.18 | 36.35 | 98.72 | 0.051  | Cytoplasm                                 |
| 14 | <i>AiSTS13</i> | Araip.THJ4F    | B04         | Araip.B04:12,276,365..12,277,327   | 963             | 320             | 34.93    | 5.17 | 37.21 | 96.28 | 0.031  | Cytoplasm                                 |
| 15 | <i>AiSTS14</i> | Araip.V9QDS    | B04         | Araip.B04:12,279,740..12,280,621   | 882             | 293             | 31.80    | 5.21 | 35.13 | 98.81 | 0.104  | Cytoplasm                                 |
| 16 | <i>AiSTS15</i> | Araip.Z5UEI    | B04         | Araip.B04:12,285,747..12,286,918   | 1,172           | 336             | 36.78    | 5.29 | 36.68 | 94.29 | -0.028 | Plastid                                   |
| 17 | <i>AiCHS2</i>  | Araip.B8TJO    | B04         | Araip.B04:12,655,555..12,657,109   | 1,555           | 389             | 42.94    | 6.22 | 38.62 | 86.99 | -0.136 | Plastid                                   |
| 18 | <i>AiSTS16</i> | Araip.E7BUX    | B04         | Araip.B04:12,684,969..12,687,006   | 2,038           | 389             | 42.81    | 7.00 | 31.78 | 91.98 | -0.075 | Plastid                                   |
| 19 | <i>AiSTS17</i> | Araip.QL51L    | B04         | Araip.B04:12,730,078..12,731,882   | 1,805           | 389             | 42.84    | 5.80 | 34.29 | 91.98 | -0.078 | Plastid                                   |
| 20 | <i>AiSTS18</i> | Araip.TTM09    | B04         | Araip.B04:12,733,386..12,735,343   | 1,958           | 390             | 42.93    | 6.14 | 31.56 | 92.51 | -0.063 | Cytoplasm                                 |
| 21 | <i>AiSTS19</i> | Araip.7P0TV    | B04         | Araip.B04:12,749,777..12,751,674   | 1,898           | 389             | 42.79    | 5.71 | 34.73 | 93.24 | -0.066 | Plastid                                   |
| 22 | <i>AiSTS20</i> | Araip.8ZH5X    | B04         | Araip.B04:12,802,390..12,804,361   | 1,972           | 390             | 42.90    | 6.14 | 32.03 | 92.26 | -0.091 | Plastid                                   |
| 23 | <i>AiSTS21</i> | Araip.62EH4    | B04         | Araip.B04:12,804,844..12,806,649   | 1,806           | 389             | 42.83    | 5.80 | 33.16 | 91.72 | -0.078 | Plastid                                   |
| 24 | <i>AiCHS3</i>  | Araip.JD11C    | B06         | Araip.B06:115,739,106..115,742,862 | 3,757           | 393             | 43.16    | 6.04 | 37.88 | 89.31 | -0.106 | Cytoplasm                                 |
| 25 | <i>AiSTS22</i> | Araip.LS9BW    | B06         | Araip.B06:130,707,884..130,709,906 | 2,023           | 390             | 42.91    | 6.14 | 31.56 | 92.51 | -0.056 | Plastid                                   |
| 26 | <i>AiSTS23</i> | Araip.Q8ZS3    | B06         | Araip.B06:130,711,132..130,713,193 | 2,062           | 389             | 42.79    | 5.80 | 32.55 | 91.72 | -0.077 | Plastid                                   |

\* PeanutBase (<https://www.peanutbase.org/>)

**Table S3.** Members of CHS and STS families in *Arachis stenosperma* genome.

| Gene |                |             |                                              |                 | Deduced Protein |          |      |       |       |        | Subcellular Localization<br>(Plant-mSubP) |
|------|----------------|-------------|----------------------------------------------|-----------------|-----------------|----------|------|-------|-------|--------|-------------------------------------------|
| Nº   | Nomenclature   | Chromossome | Genome position*                             | ORF length (bp) | Size (aa)       | MW (kDa) | pI   | II    | AI    | GRAVY  |                                           |
| 1    | <i>AsSTS1</i>  | A03         | arast.V10309.gnm1.chr01:3,168,004..3,169,589 | 1,585           | 389             | 42.87    | 5.96 | 33.42 | 92.49 | -0.090 | Plastid                                   |
| 2    | <i>AsCHS1</i>  | A04         | arast.V10309.gnm1.chr03:9,122,380..9,124,833 | 2,453           | 389             | 42.95    | 6.12 | 40.56 | 88.77 | -0.104 | Plastid                                   |
| 3    | <i>AsSTS2</i>  | A04         | arast.V10309.gnm1.chr04:1,927,806..1,929,586 | 1,780           | 389             | 42.79    | 5.67 | 36.81 | 93.98 | -0.080 | Plastid                                   |
| 4    | <i>AsSTS3</i>  | A04         | arast.V10309.gnm1.chr04:12519681..12521174   | 1,496           | 389             | 42.80    | 5.8  | 33.38 | 91.98 | -0.074 | Plastid                                   |
| 5    | <i>AsSTS4</i>  | A04         | arast.V10309.gnm1.chr04:13112419..13114200   | 1,781           | 391             | 43.16    | 6.62 | 31.10 | 91.76 | -0.090 | Plastid                                   |
| 6    | <i>AsSTS5</i>  | A04         | arast.V10309.gnm1.chr04:13150290..13152182   | 1,892           | 389             | 42.84    | 5.80 | 33.65 | 91.98 | -0.078 | Plastid                                   |
| 7    | <i>AsSTS6</i>  | A04         | arast.V10309.gnm1.chr04:13157182..13159138   | 1,956           | 391             | 43.08    | 6.41 | 32.11 | 92.76 | -0.066 | Cytoplasm                                 |
| 8    | <i>AsSTS7</i>  | A04         | arast.V10309.gnm1.chr04:13228824..13230645   | 1,821           | 391             | 43.12    | 6.62 | 31.10 | 91.76 | -0.084 | Cytoplasm                                 |
| 9    | <i>AsSTS8</i>  | A04         | arast.V10309.gnm1.chr04:13267540..13269450   | 1,910           | 389             | 42.75    | 5.95 | 32.66 | 90.72 | -0.085 | Plastid                                   |
| 10   | <i>AsSTS9</i>  | A04         | arast.V10309.gnm1.chr04:13308095..13309872   | 1,777           | 389             | 42.85    | 5.79 | 34.62 | 91.75 | -0.090 | Plastid                                   |
| 11   | <i>AsSTS10</i> | A04         | arast.V10309.gnm1.chr04:13339407..13341439   | 2,032           | 389             | 42.73    | 5.95 | 32.83 | 91.98 | -0.081 | Plastid                                   |
| 12   | <i>AsSTS11</i> | A04         | arast.V10309.gnm1.chr04:13372266..13374153   | 1,887           | 389             | 42.83    | 5.74 | 34.74 | 91.75 | -0.087 | Plastid                                   |
| 13   | <i>AsSTS12</i> | A04         | arast.V10309.gnm1.chr04:13384713..13386840   | 2,127           | 389             | 42.82    | 6.35 | 32.36 | 90.98 | -0.085 | Plastid                                   |
| 14   | <i>AsSTS13</i> | A04         | arast.V10309.gnm1.chr04:13407299..13409432   | 2,133           | 388             | 42.61    | 5.95 | 33.99 | 91.49 | -0.065 | Plastid                                   |
| 15   | <i>AsSTS14</i> | A04         | arast.V10309.gnm1.chr04:13441600..13443700   | 2,100           | 389             | 42.75    | 5.66 | 34.04 | 92.24 | -0.074 | Plastid                                   |
| 16   | <i>AsSTS15</i> | A04         | arast.V10309.gnm1.chr04:13480832..13482748   | 1,916           | 389             | 42.76    | 5.65 | 33.07 | 91.49 | -0.090 | Plastid                                   |
| 17   | <i>AsSTS16</i> | A04         | arast.V10309.gnm1.chr04:13597668..13599765   | 2,097           | 389             | 42.76    | 5.62 | 34.00 | 91.75 | -0.086 | Plastid                                   |
| 18   | <i>AsSTS17</i> | A04         | arast.V10309.gnm1.chr04:13618402..13620305   | 1,903           | 389             | 42.75    | 5.95 | 32.85 | 91.49 | -0.092 | Plastid                                   |
| 19   | <i>AsSTS18</i> | A04         | arast.V10309.gnm1.chr04:13784827..13786783   | 1,956           | 389             | 42.82    | 5.56 | 32.52 | 91.75 | -0.096 | Plastid                                   |
| 20   | <i>AsCHS2</i>  | A04         | arast.V10309.gnm1.chr04:13815467..13816885   | 1,418           | 389             | 42.99    | 6.05 | 39.03 | 87.25 | -0.161 | Cytoplasm                                 |
| 21   | <i>AsSTS19</i> | A04         | arast.V10309.gnm1.chr04:13856902..13858728   | 1,826           | 389             | 42.85    | 5.74 | 33.44 | 92.24 | -0.061 | Plastid                                   |
| 22   | <i>AsSTS20</i> | A04         | arast.V10309.gnm1.chr04:13927334..13929002   | 1,668           | 389             | 42.85    | 5.80 | 31.81 | 91.72 | -0.087 | Plastid                                   |
| 23   | <i>AsCHS3</i>  | A04         | arast.V10309.gnm1.chr05:19842691..19845569   | 2,878           | 389             | 42.86    | 6.76 | 40.44 | 90.75 | -0.121 | Cytoplasm                                 |
| 24   | <i>AsCHS4</i>  | A04         | arast.V10309.gnm1.chr05:19875719..19877380   | 1,661           | 389             | 42.89    | 6.76 | 40.44 | 90.75 | -0.123 | Plastid                                   |
| 25   | <i>AsCHS5</i>  | A05         | arast.V10309.gnm1.chr06:123369453..123374039 | 4,586           | 393             | 43.22    | 6.04 | 37.25 | 88.58 | -0.105 | Cytoplasm                                 |

\* PeanutBase (<https://www.peanutbase.org/>)



**Table S4.** Members of CHS and STS families in *Arachis hypogaea* genome.

| Nº | Nomenclature | PeanutBase ID* | Gene       |                                   |                 | Deduced Protein |          |      |       |       |        | Subcellular Localization<br>(Plant-mSubP) |
|----|--------------|----------------|------------|-----------------------------------|-----------------|-----------------|----------|------|-------|-------|--------|-------------------------------------------|
|    |              |                | Chromosome | Genome position*                  | ORF length (bp) | Size (aa)       | MW (kDa) | pI   | II    | AI    | GRAVY  |                                           |
| 1  | AhSTS1       | arahy.TF0YG1   | 01         | Arahy.01:3,140,585..3,143,008     | 2,424           | 389             | 42.89    | 5.96 | 34.30 | 92.49 | -0.090 | Plastid                                   |
| 2  | AhCHS1       | arahy.UDJX6I   | 03         | Arahy.03:8,632,413..8,635,267     | 2,855           | 389             | 42.92    | 6.48 | 40.01 | 89.77 | -0.102 | Plastid                                   |
| 3  | AhSTS2       | arahy.GQLW6A   | 04         | Arahy.04:1,920,212..1,922,274     | 2,063           | 389             | 42.79    | 5.55 | 36.81 | 93.98 | -0.08  | Plastid                                   |
| 4  | AhSTS3       | arahy.M1C18U   | 04         | Arahy.04:10,843,366..10,845,412   | 2,047           | 389             | 42.77    | 5.66 | 32.96 | 91.72 | -0.062 | Plastid                                   |
| 5  | AhSTS4       | arahy.63FKND   | 4          | Arahy.04:10,850,176..10,851,915   | 1,740           | 364             | 39.76    | 5.85 | 33.42 | 97.25 | 0.011  | Plastid                                   |
| 6  | AhSTS5       | arahy.1B4KK2   | 04         | Arahy.04:10,899,699..10,901,838   | 2,140           | 389             | 42.81    | 5.66 | 35.39 | 92.24 | -0.071 | Plastid                                   |
| 7  | AhSTS6       | arahy.JV52YF   | 04         | Arahy.04:10,905,965..10,908,058   | 2,094           | 390             | 43.00    | 6.35 | 30.66 | 93.00 | -0.061 | Cytoplasm                                 |
| 8  | AhSTS7       | arahy.NS7LJX   | 04         | Arahy.04:10,949,941..10,952,057   | 2,117           | 389             | 42.92    | 5.79 | 32.85 | 93.24 | -0.073 | Plastid                                   |
| 9  | AhSTS8       | arahy.BLK73U   | 04         | Arahy.04:10,956,032..10,958,093   | 2,062           | 389             | 42.83    | 5.79 | 32.65 | 91.75 | -0.091 | Plastid                                   |
| 10 | AhSTS9       | arahy.A621IZ   | 04         | Arahy.04:10,987,549..10,989,534   | 1,986           | 389             | 42.86    | 5.79 | 34.62 | 91.75 | -0.093 | Plastid                                   |
| 11 | AhSTS10      | arahy.3DZG8W   | 04         | Arahy.04:10,999,412..11,001,499   | 2,088           | 389             | 32.87    | 6.35 | 31.62 | 90.23 | -0.083 | Plastid                                   |
| 12 | AhSTS11      | arahy.BCQ67I   | 04         | Arahy.04:11,108,405..11,110,614   | 2,210           | 389             | 42.80    | 6.62 | 29.66 | 92.24 | -0.086 | Plastid                                   |
| 13 | AhSTS12      | arahy.MEOHAD   | 04         | Arahy.04:11,170,022..11,171,957   | 1,936           | 367             | 40.03    | 5.50 | 37.32 | 95.12 | -0.031 | Plastid                                   |
| 14 | AhSTS13      | arahy.KVQE6R   | 04         | Arahy.04:11,195,163..11,197,400   | 2,238           | 389             | 42.76    | 5.65 | 33.07 | 91.49 | -0.090 | Plastid                                   |
| 15 | AhSTS14      | arahy.EPR46C   | 04         | Arahy.04:11,288,907..11,291,272   | 2,366           | 389             | 42.85    | 5.56 | 33.13 | 91.75 | -0.098 | Plastid                                   |
| 16 | AhSTS15      | arahy.BDJ8VI   | 04         | Arahy.04:11,393,637..11,404,953   | 11,317          | 387             | 42.64    | 6.35 | 32.43 | 91.71 | -0.081 | Cytoplasm                                 |
| 17 | AhSTS16      | arahy.1N9K04   | 04         | Arahy.04:11,437,162..11,438,875   | 1,714           | 390             | 43.03    | 6.55 | 31.74 | 93.00 | -0.069 | Plastid                                   |
| 18 | AhSTS17      | arahy.ZK4XM6   | 04         | Arahy.04:11,458,470..11,460,820   | 2,351           | 390             | 42.95    | 5.95 | 29.39 | 93.00 | -0.057 | Plastid                                   |
| 19 | AhSTS18      | arahy.U6WJF3   | 04         | Arahy.04:11,461,924..11,465,577   | 3,654           | 389             | 42.82    | 5.70 | 33.64 | 91.47 | -0.074 | Plastid                                   |
| 20 | AhCHS2       | arahy.KOUY8K   | 05         | Arahy.05:38,961,309..38,963,310   | 2,002           | 389             | 42.89    | 6.76 | 40.44 | 90.75 | -0.123 | Plastid                                   |
| 21 | AhSTS19      | arahy.95I963   | 11         | Arahy.11:10,150,770..10,153,195   | 2,426           | 389             | 42.86    | 5.80 | 34.30 | 92.24 | -0.090 | Plastid                                   |
| 22 | AhCHS3       | arahy.OFI6RG   | 13         | Arahy.13:11,844,796..11,847,164   | 2,369           | 380             | 42.00    | 5.71 | 37.91 | 87.79 | -0.113 | Plastid                                   |
| 23 | AhSTS20      | arahy.303ZYM   | 14         | Arahy.14:2,637,052..2,638,957     | 1,906           | 389             | 42.88    | 5.89 | 34.99 | 92.24 | -0.096 | Plastid                                   |
| 24 | AhSTS21      | arahy.UKNP9M   | 14         | Arahy.14:2,660,308..2,662,362     | 2,055           | 389             | 42.82    | 5.67 | 36.43 | 92.98 | -0.083 | Plastid                                   |
| 25 | AhSTS22      | arahy.GTM8IY   | 14         | Arahy.14:12,410,452..12,412,394   | 1,943           | 389             | 42.80    | 5.80 | 33.38 | 91.98 | -0.072 | Plastid                                   |
| 26 | AhSTS23      | arahy.H6K3LP   | 14         | Arahy.14:12,421,243..12,423,495   | 2,253           | 390             | 42.96    | 6.04 | 34.01 | 92.00 | -0.063 | Cytoplasm                                 |
| 27 | AhSTS24      | arahy.HGK3FC   | 14         | Arahy.14:12,461,877..12,464,675   | 2,799           | 362             | 39.59    | 5.78 | 36.00 | 96.41 | 0.009  | Plastid                                   |
| 28 | AhSTS25      | arahy.I9DV29   | 14         | Arahy.14:12,495,040..12,496,987   | 1,948           | 389             | 42.86    | 5.80 | 33.16 | 91.47 | -0.085 | Plastid                                   |
| 29 | AhSTS26      | arahy.HC1E0U   | 14         | Arahy.14:12,555,149..12,557,112   | 1,964           | 389             | 42.85    | 5.96 | 31.71 | 92.24 | -0.081 | Plastid                                   |
| 30 | AhSTS27      | arahy.V739AW   | 14         | Arahy.14:12,567,832..12,569,930   | 2,099           | 389             | 42.74    | 6.61 | 31.33 | 93.50 | -0.061 | Plastid                                   |
| 31 | AhSTS28      | arahy.9Q60JN   | 14         | Arahy.14:12,574,839..12,576,929   | 2,091           | 389             | 42.83    | 5.80 | 35.67 | 91.75 | -0.070 | Plastid                                   |
| 32 | AhSTS29      | arahy.I6S6H6   | 14         | Arahy.14:12,619,232..12,621,155   | 1,924           | 389             | 42.78    | 5.96 | 32.78 | 91.75 | -0.076 | Cytoplasm                                 |
| 33 | AhSTS30      | arahy.3Z4TCL   | 14         | Arahy.14:12,660,036..12,668,048   | 8,013           | 404             | 44.45    | 5.81 | 38.88 | 89.06 | -0.118 | Cytoplasm                                 |
| 34 | AhSTS31      | arahy.AOU9FM   | 14         | Arahy.14:12,774,557..12,776,867   | 2,311           | 389             | 42.80    | 5.66 | 34.38 | 91.72 | -0.088 | Plastid                                   |
| 35 | AhSTS32      | arahy.WR54RW   | 14         | Arahy.14:12,781,801..12,783,773   | 1,973           | 389             | 42.83    | 5.65 | 33.00 | 90.49 | -0.103 | Plastid                                   |
| 36 | AhSTS33      | arahy.HQXJ4B   | 14         | Arahy.14:12,815,811..12,817,783   | 1,973           | 389             | 42.83    | 5.65 | 33.00 | 90.49 | -0.103 | Plastid                                   |
| 37 | AhSTS34      | arahy.DV6K6C   | 14         | Arahy.14:12,867,967..12,869,939   | 1,973           | 389             | 42.83    | 5.65 | 33.00 | 90.49 | -0.103 | Plastid                                   |
| 38 | AhSTS35      | arahy.QVKQ5Y   | 14         | Arahy.14:12,922,134..12,924,354   | 2,221           | 389             | 42.78    | 5.65 | 33.07 | 91.49 | -0.090 | Plastid                                   |
| 39 | AhSTS36      | arahy.2T7FQZ   | 14         | Arahy.14:12,965,692..12,967,918   | 2,227           | 389             | 42.76    | 5.76 | 33.07 | 91.49 | -0.090 | Plastid                                   |
| 40 | AhSTS37      | arahy.4IBX4Q   | 14         | Arahy.14:13,017,212..13,019,244   | 2,033           | 389             | 42.76    | 5.65 | 34.09 | 92.24 | -0.090 | Plastid                                   |
| 41 | AhCHS4       | arahy.GSLK7G   | 14         | Arahy.14:13,196,334..13,197,950   | 1,617           | 389             | 42.94    | 6.22 | 38.62 | 86.99 | -0.136 | Plastid                                   |
| 42 | AhSTS38      | arahy.YZ4W1Q   | 14         | Arahy.14:13,226,398..13,228,582   | 2,185           | 389             | 42.81    | 7.00 | 31.78 | 91.98 | -0.075 | Plastid                                   |
| 43 | AhSTS39      | arahy.F4M9UE   | 14         | Arahy.14:13,273,378..13,275,397   | 2,020           | 389             | 42.84    | 5.80 | 34.29 | 91.98 | -0.078 | Plastid                                   |
| 44 | AhSTS40      | arahy.Z2RDVM   | 14         | Arahy.14:13,276,783..13,279,100   | 2,318           | 390             | 42.93    | 6.14 | 31.56 | 92.51 | -0.063 | Cytoplasm                                 |
| 45 | AhSTS41      | arahy.R1Z4C8   | 14         | Arahy.14:13,292,704..13,294,726   | 2,023           | 389             | 42.79    | 5.71 | 34.73 | 93.24 | -0.066 | Plastid                                   |
| 46 | AhSTS42      | arahy.5YH4B6   | 14         | Arahy.14:13,324,600..13,326,847   | 2,248           | 390             | 42.99    | 7.00 | 30.49 | 92.00 | -0.076 | Cytoplasm                                 |
| 47 | AhSTS43      | arahy.VU1QU6   | 14         | Arahy.14:13,347,467..13,349,785   | 2,319           | 390             | 42.90    | 6.14 | 32.03 | 92.26 | -0.091 | Plastid                                   |
| 48 | AhSTS44      | arahy.6JHG9N   | 14         | Arahy.14:13,350,994..13,353,014   | 2,021           | 389             | 42.83    | 5.80 | 33.16 | 91.72 | -0.078 | Plastid                                   |
| 49 | AhCHS5       | arahy.6J3HHE   | 15         | Arahy.15:18,572,663..18,574,554   | 1,892           | 389             | 42.99    | 7.10 | 39.94 | 91.00 | -0.131 | Plastid                                   |
| 50 | AhCHS6       | arahy.QZN0LQ   | 15         | Arahy.15:18,595,150..18,597,004   | 1,855           | 389             | 42.99    | 7.10 | 39.94 | 91.00 | -0.131 | Plastid                                   |
| 51 | AhSTS45      | arahy.PUDN4D   | 16         | Arahy.16:147,469,931..147,472,126 | 2,196           | 390             | 42.92    | 6.14 | 31.73 | 92.77 | -0.055 | Plastid                                   |
| 52 | AhSTS46      | arahy.3WH5A3   | 16         | Arahy.16:147,473,252..147,475,265 | 2,014           | 389             | 42.80    | 5.80 | 32.55 | 91.72 | -0.077 | Plastid                                   |

\* PeanutBase (<https://www.peanutbase.org/>)
